# Supplementary material for: Presence of Zonula Occludens Toxin-Coding Genes among Vibrio parahaemolyticus Isolates of Clinical and Environmental Origin
Source: MDPI journal article supplement (doi:10.3390/microorganisms12030504), 2024-02-29
Supplement: s1 [file s1]

## Supplementary materials

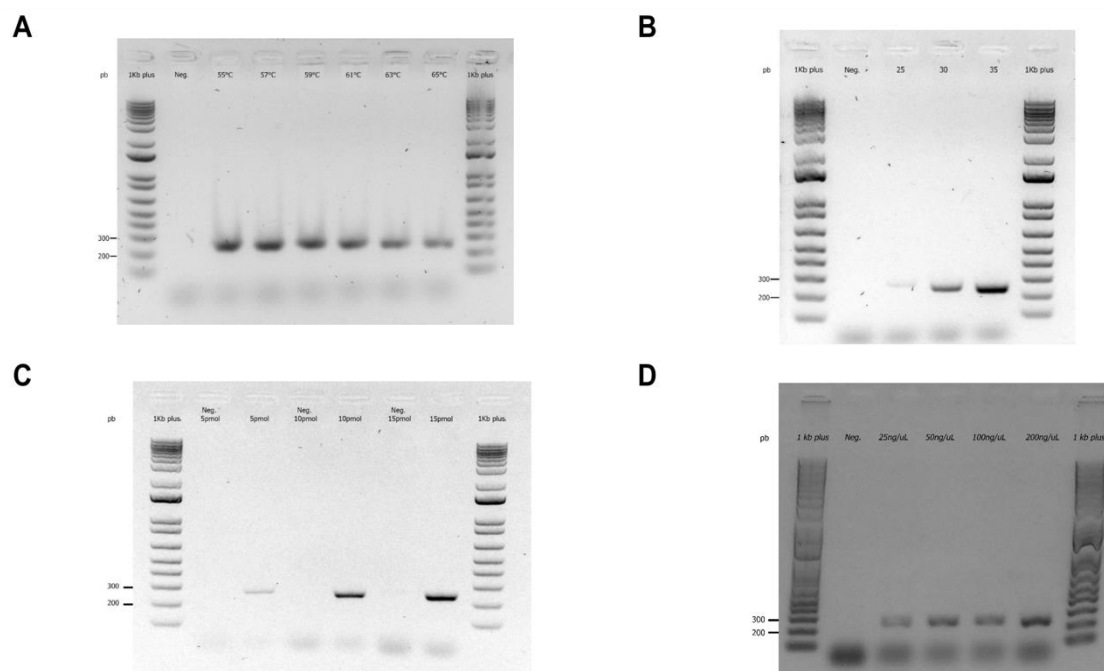

**Figure S1.** Standardization and validation of PCR assays for *V. parahaemolyticus* zot (A) Alignment temperature of zot primers for *V. parahaemolyticus*. Each lane shows an amplification result for each temperature analyzed, Neg: negative control without template DNA. (B) Amplification cycles for detection of zot in *V. parahaemolyticus*. Each lane shows the amplification result for cycles 25, 30 and 35, Neg: negative control without template DNA. (C) Amount of primer for the detection of zot in *V. parahaemolyticus*. Each lane shows the amplification result for 5, 10 and 15 pmol of each primer, Neg: negative control without template DNA. (D) Amount of gDNA for the detection of zot in *V. parahaemolyticus*. Each lane shows the amplification result for the quantities analyzed, Neg: negative control without template DNA. Image of the 1% w/v agarose gel. The molecular size standard corresponds to Ladder 1kb plus and the size of the bands that allow the identification of the resulting amplicon is indicated.

**Table S1.** Environmental isolates of *V. parahaemolyticus* from bivalve shellfish harvested in the Northern Adriatic Sea (Italy).

| ID   | Date       | Geographic origin     | Source | <i>toxR</i> | <i>tdh</i> | <i>trh</i> | TTSS1 | TTSS2a | TTSS2b | <i>zot</i> |
|------|------------|-----------------------|--------|-------------|------------|------------|-------|--------|--------|------------|
| 1122 | 30/05/2012 | Northern Adriatic Sea | clams  | 1           | 0          | 1          | 1     | 0      | 1      | 0          |
| 1128 | 13/06/2012 | Northern Adriatic Sea | clams  | 1           | 0          | 0          | 1     | 0      | 0      | 0          |
| 1129 | 19/06/2012 | Northern Adriatic Sea | clams  | 1           | 0          | 1          | 1     | 0      | 1      | 0          |
| 1140 | 28/08/2012 | Northern Adriatic Sea | clams  | 1           | 0          | 0          | 1     | 0      | 0      | 1          |
| 1141 | 29/08/2012 | Northern Adriatic Sea | clams  | 1           | 0          | 0          | 1     | 0      | 0      | 0          |
| 1147 | 26/09/2012 | Northern Adriatic Sea | clams  | 1           | 0          | 0          | 1     | 0      | 0      | 0          |
| 1158 | 24/10/2012 | Northern Adriatic Sea | clams  | 1           | 0          | 1          | 1     | 0      | 1      | 0          |

|             |            |                       |         |   |   |   |   |   |   |   |
|-------------|------------|-----------------------|---------|---|---|---|---|---|---|---|
| <b>1162</b> | 14/11/2012 | Northern Adriatic Sea | clams   | 1 | 0 | 0 | 1 | 0 | 0 | 0 |
| <b>1163</b> | 15/11/2012 | Northern Adriatic Sea | clams   | 1 | 0 | 0 | 1 | 0 | 0 | 0 |
| <b>1164</b> | 21/11/2012 | Northern Adriatic Sea | clams   | 1 | 0 | 1 | 1 | 0 | 1 | 0 |
| <b>1172</b> | 13/12/2012 | Northern Adriatic Sea | clams   | 1 | 0 | 0 | 1 | 0 | 0 | 1 |
| <b>1182</b> | 14/05/2013 | Northern Adriatic Sea | mussels | 1 | 0 | 0 | 1 | 0 | 0 | 1 |
| <b>1204</b> | 19/11/2013 | Northern Adriatic Sea | clams   | 1 | 0 | 0 | 1 | 0 | 0 | 1 |
| <b>1213</b> | 03/03/2014 | Northern Adriatic Sea | clams   | 1 | 0 | 0 | 1 | 0 | 0 | 0 |
| <b>1214</b> | 06/03/2014 | Northern Adriatic Sea | clams   | 1 | 0 | 0 | 1 | 0 | 0 | 1 |
| <b>1215</b> | 12/03/2014 | Northern Adriatic Sea | clams   | 1 | 0 | 1 | 1 | 0 | 1 | 0 |
| <b>1219</b> | 06/05/2014 | Northern Adriatic Sea | mussels | 1 | 0 | 0 | 1 | 1 | 0 | 0 |
| <b>1220</b> | 09/05/2014 | Northern Adriatic Sea | clams   | 1 | 0 | 0 | 1 | 1 | 0 | 0 |
| <b>1221</b> | 09/05/2014 | Northern Adriatic Sea | clams   | 1 | 0 | 1 | 1 | 0 | 1 | 1 |
| <b>1225</b> | 29/05/2014 | Northern Adriatic Sea | clams   | 1 | 0 | 1 | 1 | 0 | 1 | 0 |
| <b>1226</b> | 30/05/2014 | Northern Adriatic Sea | clams   | 1 | 0 | 1 | 1 | 0 | 1 | 0 |
| <b>1231</b> | 18/06/2014 | Northern Adriatic Sea | clams   | 1 | 0 | 0 | 1 | 0 | 0 | 0 |
| <b>1234</b> | 30/06/2014 | Northern Adriatic Sea | clams   | 1 | 0 | 1 | 1 | 0 | 1 | 0 |
| <b>1237</b> | 01/07/2014 | Northern Adriatic Sea | clams   | 1 | 0 | 0 | 1 | 0 | 0 | 1 |
| <b>1242</b> | 04/08/2014 | Northern Adriatic Sea | clams   | 1 | 0 | 0 | 1 | 0 | 0 | 1 |
| <b>1246</b> | 21/08/2014 | Northern Adriatic Sea | clams   | 1 | 0 | 0 | 1 | 0 | 0 | 0 |
| <b>1252</b> | 02/09/2014 | Northern Adriatic Sea | clams   | 1 | 0 | 0 | 1 | 0 | 0 | 0 |
| <b>1260</b> | 06/10/2014 | Northern Adriatic Sea | clams   | 1 | 0 | 0 | 1 | 0 | 0 | 0 |
| <b>1262</b> | 09/10/2014 | Northern Adriatic Sea | clams   | 1 | 0 | 0 | 1 | 0 | 0 | 1 |
| <b>1269</b> | 10/11/2014 | Northern Adriatic Sea | clams   | 1 | 0 | 0 | 1 | 0 | 0 | 1 |
| <b>1272</b> | 10/11/2014 | Northern Adriatic Sea | clams   | 1 | 0 | 0 | 1 | 0 | 0 | 0 |
| <b>1275</b> | 18/11/2014 | Northern Adriatic Sea | clams   | 1 | 0 | 0 | 1 | 0 | 0 | 0 |

|             |            |                       |         |   |   |   |   |   |   |   |
|-------------|------------|-----------------------|---------|---|---|---|---|---|---|---|
| <b>1282</b> | 02/12/2014 | Northern Adriatic Sea | clams   | 1 | 0 | 0 | 1 | 0 | 0 | 0 |
| <b>1291</b> | 21/04/2015 | Northern Adriatic Sea | oysters | 1 | 0 | 0 | 1 | 0 | 0 | 1 |
| <b>1292</b> | 27/04/2015 | Northern Adriatic Sea | clams   | 1 | 0 | 0 | 1 | 0 | 0 | 0 |
| <b>1300</b> | 06/07/2015 | Northern Adriatic Sea | clams   | 1 | 0 | 0 | 1 | 0 | 0 | 0 |
| <b>1303</b> | 08/07/2015 | Northern Adriatic Sea | clams   | 1 | 0 | 0 | 1 | 0 | 0 | 0 |
| <b>1304</b> | 16/07/2015 | Northern Adriatic Sea | clams   | 1 | 0 | 0 | 1 | 0 | 0 | 0 |
| <b>1326</b> | 14/12/2015 | Northern Adriatic Sea | mussels | 1 | 0 | 0 | 1 | 0 | 0 | 0 |
| <b>1329</b> | 21/12/2015 | Northern Adriatic Sea | clams   | 1 | 0 | 0 | 1 | 0 | 0 | 0 |
| <b>1332</b> | 26/01/2016 | Northern Adriatic Sea | clams   | 1 | 0 | 0 | 1 | 0 | 0 | 0 |
| <b>1340</b> | 16/05/2016 | Northern Adriatic Sea | clams   | 1 | 0 | 1 | 1 | 0 | 1 | 0 |
| <b>1341</b> | 18/05/2016 | Northern Adriatic Sea | clams   | 1 | 0 | 0 | 1 | 1 | 0 | 0 |
| <b>1344</b> | 24/05/2016 | Northern Adriatic Sea | mussels | 1 | 0 | 0 | 1 | 0 | 0 | 0 |
| <b>1346</b> | 25/05/2016 | Northern Adriatic Sea | mussels | 1 | 0 | 0 | 1 | 0 | 0 | 0 |
| <b>1349</b> | 06/06/2016 | Northern Adriatic Sea | clams   | 1 | 0 | 0 | 1 | 1 | 0 | 0 |
| <b>1354</b> | 13/06/2016 | Northern Adriatic Sea | clams   | 1 | 0 | 0 | 1 | 0 | 0 | 1 |
| <b>1372</b> | 07/07/2016 | Northern Adriatic Sea | clams   | 1 | 0 | 0 | 1 | 0 | 0 | 0 |
| <b>1395</b> | 10/08/2016 | Northern Adriatic Sea | clams   | 1 | 0 | 0 | 1 | 0 | 0 | 1 |
| <b>1404</b> | 20/09/2016 | Northern Adriatic Sea | mussels | 1 | 0 | 0 | 1 | 0 | 0 | 0 |
| <b>1411</b> | 06/10/2016 | Northern Adriatic Sea | clams   | 1 | 0 | 0 | 1 | 0 | 0 | 1 |
| <b>1419</b> | 25/10/2016 | Northern Adriatic Sea | clams   | 1 | 0 | 0 | 1 | 0 | 0 | 0 |
| <b>1425</b> | 07/11/2016 | Northern Adriatic Sea | clams   | 1 | 0 | 0 | 1 | 0 | 0 | 0 |
| <b>1429</b> | 09/11/2016 | Northern Adriatic Sea | mussels | 1 | 0 | 0 | 1 | 0 | 0 | 0 |

1: presence and 0: absence.
